# Supplementary material
Source: PubMed Central journal article supplement (PMC4036699)
Supplement: NIHMS527472-supplement-Supplementary_Table_1.pdf [file NIHMS527472-supplement-Supplementary_Table_1.pdf]

| Abbreviated Name                             | Full Name                                                           | Source             | Domain           | Scale       | # missing | min  | max   | mean | Possible Levels                                                    |
|----------------------------------------------|---------------------------------------------------------------------|--------------------|------------------|-------------|-----------|------|-------|------|--------------------------------------------------------------------|
| study site                                   | OPPERA study site                                                   | CATI               | NA               | Categorical | 0         |      |       |      | Buffalo, Maryland, North Carolina, Florida                         |
| gender                                       | Gender                                                              | CATI               | Sociodemographic | Categorical | 0         |      |       |      | Male, Female                                                       |
| age                                          | Age (years)                                                         | CATI               | Sociodemographic | Continuous  | 0         | 18.0 | 44.0  | 27.1 |                                                                    |
| race                                         | Race                                                                | Demographic Survey | Sociodemographic | Categorical | 0         |      |       |      | White, African-American, Hispanic, Asian, Other                    |
| lifetime U.S. residence                      | How long have you lived in the United States?                       | Demographic Survey | Sociodemographic | Categorical | 0         |      |       |      | All my life, Less than all my life, Unknown                        |
| first spoken language                        | What is the first language you learned to speak?                    | Demographic Survey | Sociodemographic | Categorical | 20        |      |       |      | English, Not English                                               |
| marital status                               | What is your current marital status?                                | Demographic Survey | Sociodemographic | Categorical | 42        |      |       |      | Married/living-as-married/separated/divorced, Never married        |
| educational attainment                       | What is the highest grade or level of schooling you have completed? | Demographic Survey | Sociodemographic | Categorical | 35        |      |       |      | High school or less, Post-HS/some college, College, Post-graduate" |
| satisfaction with financial situation        | How satisfied are you with your current financial situation?        | Demographic Survey | Sociodemographic | Continuous  | 34        | 0.0  | 10.0  | 5.0  |                                                                    |
| satisfaction with material standards in life | How satisfied are you with the material standards of your life?     | Demographic Survey | Sociodemographic | Continuous  | 47        | 0.0  | 10.0  | 6.8  |                                                                    |
| covered by health insurance                  | What kind of health insurance or health care coverage do you have?  | Demographic Survey | Sociodemographic | Categorical | 90        |      |       |      | Yes, No                                                            |
| KOHN                                         | KOHN Global Score                                                   | KOHN               | Psychosocial     | Continuous  | 0         | 29.0 | 112.0 | 71.6 |                                                                    |
| somatic symptom reporting (PILL)             | Pill Global Score                                                   | PILL               | Psychosocial     | Continuous  | 0         | 54.0 | 203.0 | 89.1 |                                                                    |
| mood - agreeable/hostile (POMS-Bi)           | POMS-Bi Agreeable/Hostile Score                                     | POMS-Bi            | Psychosocial     | Continuous  | 0         | 0.0  | 36.0  | 27.9 |                                                                    |

| Abbreviated Name                         | Full Name                               | Source  | Domain       | Scale      | # missing | min  | max   | mean | Possible Levels |
|------------------------------------------|-----------------------------------------|---------|--------------|------------|-----------|------|-------|------|-----------------|
| mood - elated/depressed (POMS-Bi)        | POMS-Bi Elated/Depressed Score          | POMS-Bi | Psychosocial | Continuous | 0         | 0.0  | 36.0  | 26.3 |                 |
| mood - confident/unsure (POMS-Bi)        | POMS-Bi Confident/Unsure Score          | POMS-Bi | Psychosocial | Continuous | 0         | 3.0  | 36.0  | 24.6 |                 |
| mood - energetic/tired (POMS-Bi)         | POMS-Bi Energetic/Tired Score           | POMS-Bi | Psychosocial | Continuous | 0         | 1.0  | 36.2  | 23.3 |                 |
| mood - clearheaded/confused (POMS-Bi)    | POMS-Bi Clearheaded/Confused Score      | POMS-Bi | Psychosocial | Continuous | 0         | 3.0  | 36.0  | 27.8 |                 |
| mood - composed/anxious (POMS-Bi)        | POMS-Bi Composed/Anxious Score          | POMS-Bi | Psychosocial | Continuous | 0         | 2.0  | 36.0  | 26.3 |                 |
| mood - overall positive affect (POMS-Bi) | POMS-Bi Overall Positive Affect Score   | POMS-Bi | Psychosocial | Continuous | 0         | 31.0 | 120.0 | 87.5 |                 |
| mood - overall negative affect (POMS-Bi) | POMS-Bi Overall Negative Affect Score   | POMS-Bi | Psychosocial | Continuous | 0         | 29.7 | 119.0 | 49.2 |                 |
| perceived stress (PSS)                   | Perceived Stress Scale                  | PSS     | Psychosocial | Continuous | 0         | 0.0  | 36.0  | 14.4 |                 |
| depression (SCL 90R)                     | SCL 90R Depression Scale                | SCL-90R | Psychosocial | Continuous | 0         | 0.0  | 3.7   | 0.4  |                 |
| somatization (SCL 90R)                   | SCL 90R Somatization Scale              | SCL-90R | Psychosocial | Continuous | 0         | 0.0  | 2.7   | 0.2  |                 |
| anxiety (SCL 90R)                        | SCL 90R Anxiety Scale                   | SCL-90R | Psychosocial | Continuous | 0         | 0.0  | 2.9   | 0.2  |                 |
| obsessive compulsive (SCL 90R)           | SCL 90R Obsessive Compulsive Scale      | SCL-90R | Psychosocial | Continuous | 0         | 0.0  | 3.6   | 0.4  |                 |
| interpersonal sensitivity (SCL 90R)      | SCL 90R Interpersonal Sensitivity Scale | SCL-90R | Psychosocial | Continuous | 0         | 0.0  | 3.9   | 0.3  |                 |
| hostility (SCL 90R)                      | SCL 90R Hostility Scale                 | SCL-90R | Psychosocial | Continuous | 0         | 0.0  | 3.5   | 0.3  |                 |
| phobia (SCL 90R)                         | SCL 90R Phobia Scale                    | SCL-90R | Psychosocial | Continuous | 0         | 0.0  | 3.9   | 0.1  |                 |
| paranoid (SCL 90R)                       | SCL 90R Paranoid Scale                  | SCL-90R | Psychosocial | Continuous | 0         | 0.0  | 4.0   | 0.3  |                 |
| psychotic (SCL 90R)                      | SCL 90R Psychotic Scale                 | SCL-90R | Psychosocial | Continuous | 0         | 0.0  | 3.6   | 0.2  |                 |
| global severity (SCL 90R)                | SCL 90R Global Severity Index           | SCL-90R | Psychosocial | Continuous | 0         | 0.0  | 2.9   | 0.3  |                 |
| coping - distraction (CSQ)               | CSQ Distraction Scale                   | CSQ     | Psychosocial | Continuous | 0         | 0.0  | 6.0   | 2.4  |                 |
| coping - catastrophizing (CSQ)           | CSQ Catastrophizing Scale               | CSQ     | Psychosocial | Continuous | 0         | 0.0  | 6.0   | 0.9  |                 |

| Abbreviated Name                      | Full Name                                        | Source        | Domain           | Scale      | # missing | min   | max   | mean  | Possible Levels |
|---------------------------------------|--------------------------------------------------|---------------|------------------|------------|-----------|-------|-------|-------|-----------------|
| coping - ignoring pain (CSQ)          | CSQ IgnoringPain Scale                           | CSQ           | Psychosocial     | Continuous | 0         | 0.0   | 6.0   | 2.6   |                 |
| coping - distancing (CSQ)             | CSQ Distancing Scale                             | CSQ           | Psychosocial     | Continuous | 0         | 0.0   | 6.0   | 1.2   |                 |
| coping - coping (CSQ)                 | CSQ Coping Scale                                 | CSQ           | Psychosocial     | Continuous | 0         | 0.0   | 6.0   | 3.6   |                 |
| coping - praying (CSQ)                | CSQ Praying Scale                                | CSQ           | Psychosocial     | Continuous | 0         | 0.0   | 6.0   | 2.3   |                 |
| state anxiety (STAI form Y-1)         | STAIY State Anxiety Inventory                    | STAI Form Y-1 | Psychosocial     | Continuous | 0         | 17.3  | 71.0  | 30.6  |                 |
| trait anxiety (STAI form Y-2)         | STAIY Trait Anxiety Inventory                    | STAI Form Y-2 | Psychosocial     | Continuous | 0         | 20.0  | 77.0  | 35.3  |                 |
| Negative impact of life events (LES)  | LES Negative Impact Score                        | LES           | Psychosocial     | Continuous | 0         | -0.1  | 77.0  | 5.5   |                 |
| Positive impact of life events (LES)  | LES Positive Impact Score                        | LES           | Psychosocial     | Continuous | 0         | 0.0   | 51.0  | 5.9   |                 |
| catastrophizing - rumination (PCS)    | PCS Ruminationn Score                            | PCS           | Psychosocial     | Continuous | 0         | 0.0   | 16.0  | 4.2   |                 |
| catastrophizing - magnification (PCS) | PCS Magnification Score                          | PCS           | Psychosocial     | Continuous | 0         | 0.0   | 12.0  | 1.8   |                 |
| catastrophizing - helplessness (PCS)  | PCS Helplessnessn Score                          | PCS           | Psychosocial     | Continuous | 0         | 0.0   | 24.0  | 3.4   |                 |
| extraversion (EPQ)                    | EPQ-R Extraversion Scale                         | EPQ           | Psychosocial     | Continuous | 0         | 0.0   | 12.0  | 8.4   |                 |
| EPQ Lie scale                         | EPQ-R Lie Scale                                  | EPQ           | Psychosocial     | Continuous | 0         | 0.0   | 16.0  | 6.2   |                 |
| neuroticism (EPQ)                     | EPQ-R Neuroticism Scale                          | EPQ           | Psychosocial     | Continuous | 0         | 0.0   | 12.0  | 4.2   |                 |
| psychoticism (EPQ)                    | EPQ-R Psychoticism Scale                         | EPQ           | Psychosocial     | Continuous | 0         | 0.0   | 15.0  | 2.4   |                 |
| pressure pain threshold (temporalis)  | Pressure Pain Threshold: Temporalis (kPa)        | QST           | Pain Sensitivity | Continuous | 0         | 52.7  | 600.0 | 217.9 |                 |
| pressure pain threshold (masseter)    | Pressure Pain Threshold: Masseter (kPa)          | QST           | Pain Sensitivity | Continuous | 0         | 55.1  | 600.0 | 200.9 |                 |
| pressure pain threshold (TMJ)         | Pressure Pain Threshold: TM Joint (kPa)          | QST           | Pain Sensitivity | Continuous | 0         | 53.5  | 521.5 | 182.5 |                 |
| pressure pain threshold (trapezius)   | Pressure Pain Threshold: Trapezius (kPa)         | QST           | Pain Sensitivity | Continuous | 0         | 106.6 | 600.0 | 370.6 |                 |
| pressure pain threshold (epicondyl)   | Pressure Pain Threshold: Lateral Epicondyl (kPa) | QST           | Pain Sensitivity | Continuous | 0         | 104.2 | 600.0 | 388.5 |                 |

| Abbreviated Name                              | Full Name                                                  | Source | Domain           | Scale      | # missing | min   | max   | mean  | Possible Levels |
|-----------------------------------------------|------------------------------------------------------------|--------|------------------|------------|-----------|-------|-------|-------|-----------------|
| mechanical pain threshold                     | Mechanical Cutaneous Pain Threshold (mN)                   | QST    | Pain Sensitivity | Continuous | 0         | 102.0 | 600.0 | 396.9 |                 |
| mechanical single stimulus rating (256 mN)    | Mechanical Single Stimulus Rating (256 mN probe)           | QST    | Pain Sensitivity | Continuous | 0         | 0.0   | 92.5  | 9.0   |                 |
| mechanical single stimulus rating (512 mN)    | Mechanical Single Stimulus Rating (512 mN probe)           | QST    | Pain Sensitivity | Continuous | 0         | 0.0   | 100.0 | 16.7  |                 |
| mechanical temporal summation (256 mN)        | Mechanical Temporal Summation (256 mN probe)               | QST    | Pain Sensitivity | Continuous | 0         | -43.8 | 96.3  | 9.5   |                 |
| mechanical temporal summation (512 mN)        | Mechanical Temporal Summation (512 mN probe)               | QST    | Pain Sensitivity | Continuous | 0         | -27.5 | 93.8  | 17.0  |                 |
| mechanical pain aftersensation (256 mN, 15 s) | Mechanical Pain Aftersensation Rating (256 mN probe, 15 s) | QST    | Pain Sensitivity | Continuous | 0         | 0.0   | 71.3  | 3.1   |                 |
| mechanical pain aftersensation (512 mN, 15 s) | Mechanical Pain Aftersensation Rating (512 mN probe, 15 s) | QST    | Pain Sensitivity | Continuous | 0         | 0.0   | 100.0 | 8.4   |                 |
| mechanical pain aftersensation (256 mN, 30 s) | Mechanical Pain Aftersensation Rating (256 mN probe, 30 s) | QST    | Pain Sensitivity | Continuous | 0         | -0.2  | 52.5  | 1.5   |                 |
| mechanical pain aftersensation (512 mN, 30 s) | Mechanical Pain Aftersensation Rating (512 mN probe, 30 s) | QST    | Pain Sensitivity | Continuous | 0         | 0.0   | 96.1  | 4.8   |                 |
| heat pain tolerance                           | Heat Pain Tolerance (°C)                                   | QST    | Pain Sensitivity | Continuous | 0         | 34.6  | 51.6  | 46.2  |                 |
| heat pain aftersensation (46°C, 15 s)         | Heat Pain Aftersensation Rating (46°C, 15 s)               | QST    | Pain Sensitivity | Continuous | 0         | -1.8  | 100.0 | 9.0   |                 |
| heat pain aftersensation (48°C, 15 s)         | Heat Pain Aftersensation Rating (48°C, 15 s)               | QST    | Pain Sensitivity | Continuous | 0         | 0.0   | 114.0 | 13.6  |                 |
| heat pain aftersensation (50°C, 15 s)         | Heat Pain Aftersensation Rating (50°C, 15 s)               | QST    | Pain Sensitivity | Continuous | 0         | 0.0   | 112.6 | 15.7  |                 |
| heat pain aftersensation (46°C, 30 s)         | Heat Pain Aftersensation Rating (46°C, 30 s)               | QST    | Pain Sensitivity | Continuous | 0         | -1.1  | 100.0 | 5.0   |                 |
| heat pain aftersensation (48°C, 30 s)         | Heat Pain Aftersensation Rating (48°C, 30 s)               | QST    | Pain Sensitivity | Continuous | 0         | -0.8  | 100.0 | 8.6   |                 |

| Abbreviated Name                                                | Full Name                                                                  | Source | Domain           | Scale      | # missing | min    | max     | mean  | Possible Levels |
|-----------------------------------------------------------------|----------------------------------------------------------------------------|--------|------------------|------------|-----------|--------|---------|-------|-----------------|
| heat pain aftersensation (50°C, 30 s)                           | Heat Pain Aftersensation Rating (50°C, 30 s)                               | QST    | Pain Sensitivity | Continuous | 0         | 0.0    | 100.0   | 9.3   |                 |
| heat pain single stimulus rating (46°C)                         | Heat Pain Single Stimulus Rating (46°C)                                    | QST    | Pain Sensitivity | Continuous | 0         | 0.0    | 100.0   | 36.3  |                 |
| heat pain single stimulus rating (48°C)                         | Heat Pain Single Stimulus Rating (46°C)                                    | QST    | Pain Sensitivity | Continuous | 0         | 0.0    | 100.0   | 45.2  |                 |
| heat pain single stimulus rating (50°C)                         | Heat Pain Single Stimulus Rating (46°C)                                    | QST    | Pain Sensitivity | Continuous | 0         | 0.0    | 109.7   | 57.9  |                 |
| heat pain ratings of 10 stimuli: area under curve (46°C)        | Heat Pain Ratings of 10 Stimuli: Area Under Curve (46°C)                   | QST    | Pain Sensitivity | Continuous | 0         | 0.0    | 920.8   | 442.8 |                 |
| heat pain ratings of 10 stimuli: area under curve (48°C)        | Heat Pain Ratings of 10 Stimuli: Area Under Curve (48°C)                   | QST    | Pain Sensitivity | Continuous | 0         | 0.0    | 1,023.8 | 549.4 |                 |
| heat pain ratings of 10 stimuli: area under curve (50°C)        | Heat Pain Ratings of 10 Stimuli: Area Under Curve (50°C)                   | QST    | Pain Sensitivity | Continuous | 0         | 0.0    | 1,076.5 | 652.6 |                 |
| heat pain temporal summation: highest minus first rating (46°C) | Heat Pain Temporal Summation: Highest Minus First Rating (46°C)            | QST    | Pain Sensitivity | Continuous | 0         | -90.0  | 100.0   | 18.3  |                 |
| heat pain temporal summation: highest minus first rating (48°C) | Heat Pain Temporal Summation: Highest Minus First Rating (48°C)            | QST    | Pain Sensitivity | Continuous | 0         | -100.0 | 100.0   | 22.0  |                 |
| heat pain temporal summation: highest minus first rating (50°C) | Heat Pain Temporal Summation: Highest Minus First Rating (50°C)            | QST    | Pain Sensitivity | Continuous | 0         | -100.0 | 97.0    | 19.4  |                 |
| heat pain temporal summation: slope (46°C)                      | Heat Pain Temporal Summation: Slope of Line for First Three Ratings (46°C) | QST    | Pain Sensitivity | Continuous | 0         | -35.0  | 50.0    | 5.6   |                 |
| heat pain temporal summation: slope (48°C)                      | Heat Pain Temporal Summation: Slope of Line for First Three Ratings (48°C) | QST    | Pain Sensitivity | Continuous | 0         | -30.0  | 50.0    | 6.4   |                 |
| heat pain temporal summation: slope (50°C)                      | Heat Pain Temporal Summation: Slope of Line for First Three Ratings (50°C) | QST    | Pain Sensitivity | Continuous | 0         | -50.0  | 47.5    | 6.1   |                 |

| Abbreviated Name                                       | Full Name                                                     | Source | Domain    | Scale      | # missing | min  | max   | mean  | Possible Levels |
|--------------------------------------------------------|---------------------------------------------------------------|--------|-----------|------------|-----------|------|-------|-------|-----------------|
| average systolic BP (resting)                          | Average Resting Systolic Blood Pressure (mmHg)                | QST    | Autonomic | Continuous | 0         | 76.7 | 171.7 | 111.0 |                 |
| average diastolic BP (resting)                         | Average Resting Diastolic Blood Pressure (mmHg)               | QST    | Autonomic | Continuous | 0         | 42.6 | 97.3  | 65.0  |                 |
| average mean arterial pressure (resting)               | Average Resting Mean Arterial Blood Pressure (mmHg)           | QST    | Autonomic | Continuous | 0         | 56.7 | 127.3 | 82.7  |                 |
| average heart rate - cuff (resting)                    | Average Resting Heart Rate - Cuff (bpm)                       | QST    | Autonomic | Continuous | 0         | 37.3 | 105.3 | 62.9  |                 |
| average systolic BP (orthostatic challenge)            | Orthostatic Challenge Average Systolic Blood Pressure (mmHg)  | QST    | Autonomic | Continuous | 0         | 62.0 | 173.0 | 117.1 |                 |
| average diastolic BP (orthostatic challenge)           | Orthostatic Challenge Average Diastolic Blood Pressure (mmHg) | QST    | Autonomic | Continuous | 0         | 40.0 | 128.3 | 73.3  |                 |
| average mean arterial pressure (orthostatic challenge) | Orthostatic Challenge Mean Arterial Blood Pressure (mmHg)     | QST    | Autonomic | Continuous | 0         | 51.0 | 163.0 | 91.4  |                 |
| average heart rate - cuff (orthostatic challenge)      | Orthostatic Challenge Average Heart Rate - Cuff (bpm)         | QST    | Autonomic | Continuous | 0         | 42.0 | 137.0 | 84.6  |                 |
| average systolic BP (color-word Stroop)                | Color-Word Stroop Average Systolic Blood Pressure (mmHg)      | QST    | Autonomic | Continuous | 0         | 81.0 | 185.6 | 115.8 |                 |
| average diastolic BP (color-word Stroop)               | Color-Word Stroop Average Diastolic Blood Pressure (mmHg)     | QST    | Autonomic | Continuous | 0         | 47.0 | 112.1 | 71.6  |                 |
| average mean arterial pressure (color-word Stroop)     | Color-Word Stroop Mean Arterial Blood Pressure (mmHg)         | QST    | Autonomic | Continuous | 0         | 62.2 | 139.8 | 88.8  |                 |
| average heart rate - cuff (color-word Stroop)          | Color-Word Stroop Average Heart Rate - Cuff (bpm)             | QST    | Autonomic | Continuous | 0         | 43.8 | 113.4 | 72.2  |                 |
| average systolic BP (pain-affect Stroop)               | Pain-Affect Stroop Average Systolic Blood Pressure (mmHg)     | QST    | Autonomic | Continuous | 0         | 80.2 | 182.3 | 113.7 |                 |
| average diastolic BP (pain-affect Stroop)              | Pain-Affect Stroop Average Diastolic Blood Pressure (mmHg)    | QST    | Autonomic | Continuous | 0         | 45.4 | 103.4 | 69.5  |                 |

| Abbreviated Name                                    | Full Name                                                                                                   | Source | Domain    | Scale      | # missing | min   | max   | mean | Possible Levels |
|-----------------------------------------------------|-------------------------------------------------------------------------------------------------------------|--------|-----------|------------|-----------|-------|-------|------|-----------------|
| average mean arterial pressure (pain-affect Stroop) | Pain-Affect Stroop Mean Arterial Blood Pressure (mmHg)                                                      | QST    | Autonomic | Continuous | 0         | 59.6  | 133.1 | 86.5 |                 |
| average heart rate - cuff (pain-affect Stroop)      | Pain-Affect Stroop Average Heart Rate - Cuff (bpm)                                                          | QST    | Autonomic | Continuous | 0         | 42.0  | 111.6 | 72.4 |                 |
| average heart rate - ECG (resting)                  | Average Resting Heart Rate - ECG (bpm)                                                                      | QST    | Autonomic | Continuous | 0         | 40.4  | 107.0 | 64.4 |                 |
| HRV: SDNN (resting)                                 | Resting Heart Rate Variability - Standard Deviation of Normal-to-Normal Intervals (ms)                      | QST    | Autonomic | Continuous | 0         | 11.8  | 437.3 | 80.9 |                 |
| HRV: RMSSD (resting)                                | Resting Heart Rate Variability - Root Mean Square of the Difference Between Normal-to-Normal Intervals (ms) | QST    | Autonomic | Continuous | 0         | -20.4 | 862.3 | 77.5 |                 |
| HRV: total power (resting)                          | Resting Heart Rate Variability: Log of Total Power (ms <sup>2</sup> )                                       | QST    | Autonomic | Continuous | 0         | 3.1   | 10.5  | 7.2  |                 |
| HRV: low frequency (resting)                        | Resting Heart Rate Variability: Log of Low Frequency (ms <sup>2</sup> )                                     | QST    | Autonomic | Continuous | 0         | 2.4   | 8.6   | 6.1  |                 |
| HRV: very low frequency (resting)                   | Resting Heart Rate Variability: Log of Very Low Frequency (ms <sup>2</sup> )                                | QST    | Autonomic | Continuous | 0         | 1.6   | 9.2   | 5.9  |                 |
| HRV: high frequency (resting)                       | Resting Heart Rate Variability: Log of High Frequency (ms <sup>2</sup> )                                    | QST    | Autonomic | Continuous | 0         | 1.4   | 11.5  | 5.7  |                 |
| average heart rate - ECG (orthostatic challenge)    | Average Orthostatic Challenge Heart Rate - ECG (bpm)                                                        | QST    | Autonomic | Continuous | 0         | 45.1  | 135.4 | 81.9 |                 |
| HRV: SDNN (orthostatic challenge)                   | Orthostatic Challenge Heart Rate Variability - Standard Deviation of Normal-to-Normal Intervals (ms)        | QST    | Autonomic | Continuous | 0         | -73.7 | 629.6 | 75.0 |                 |

| Abbreviated Name                                | Full Name                                                                                                                 | Source | Domain    | Scale      | # missing | min   | max   | mean | Possible Levels |
|-------------------------------------------------|---------------------------------------------------------------------------------------------------------------------------|--------|-----------|------------|-----------|-------|-------|------|-----------------|
| HRV: RMSSD (orthostatic challenge)              | Orthostatic Challenge Heart Rate Variability - Root Mean Square of the Difference Between Normal-to-Normal Intervals (ms) | QST    | Autonomic | Continuous | 0         | -83.2 | 908.9 | 37.0 |                 |
| HRV: total power (orthostatic challenge)        | Orthostatic Challenge Heart Rate Variability: Log of Total Power (ms <sup>2</sup> )                                       | QST    | Autonomic | Continuous | 0         | 2.8   | 16.7  | 7.1  |                 |
| HRV: low frequency (orthostatic challenge)      | Orthostatic Challenge Heart Rate Variability: Log of Low Frequency (ms <sup>2</sup> )                                     | QST    | Autonomic | Continuous | 0         | 2.5   | 13.4  | 6.3  |                 |
| HRV: very low frequency (orthostatic challenge) | Orthostatic Challenge Heart Rate Variability: Log of Very Low Frequency (ms <sup>2</sup> )                                | QST    | Autonomic | Continuous | 0         | 1.6   | 16.0  | 6.1  |                 |
| HRV: high frequency (orthostatic challenge)     | Orthostatic Challenge Heart Rate Variability: Log of High Frequency (ms <sup>2</sup> )                                    | QST    | Autonomic | Continuous | 0         | -0.3  | 22.2  | 4.5  |                 |
| average heart rate - ECG (color-word Stroop)    | Average Color-Word Stroop Heart Rate - ECG (bpm)                                                                          | QST    | Autonomic | Continuous | 0         | 41.7  | 167.1 | 72.1 |                 |
| HRV: SDNN (color-word Stroop)                   | Color-Word Stroop Heart Rate Variability - Standard Deviation of Normal-to-Normal Intervals (ms)                          | QST    | Autonomic | Continuous | 0         | -60.1 | 455.8 | 60.4 |                 |
| HRV: RMSSD (color-word Stroop)                  | Color-Word Stroop Heart Rate Variability - Root Mean Square of the Difference Between Normal-to-Normal Intervals (ms)     | QST    | Autonomic | Continuous | 0         | -78.7 | 633.1 | 54.2 |                 |
| HRV: total power (color-word Stroop)            | Color-Word Stroop Heart Rate Variability: Log of Total Power (ms <sup>2</sup> )                                           | QST    | Autonomic | Continuous | 0         | 2.7   | 15.3  | 6.6  |                 |



| Abbreviated Name                              | Full Name                                                                                                              | Source | Domain    | Scale      | # missing | min  | max   | mean | Possible Levels |
|-----------------------------------------------|------------------------------------------------------------------------------------------------------------------------|--------|-----------|------------|-----------|------|-------|------|-----------------|
| HRV: low frequency (color-word Stroop)        | Color-Word Stroop Heart Rate Variability: Log of Low Frequency (ms <sup>2</sup> )                                      | QST    | Autonomic | Continuous | 0         | 2.1  | 12.8  | 5.5  |                 |
| HRV: very low frequency (color-word Stroop)   | Color-Word Stroop Heart Rate Variability: Log of Very Low Frequency (ms <sup>2</sup> )                                 | QST    | Autonomic | Continuous | 0         | 1.7  | 14.4  | 5.5  |                 |
| HRV: high frequency (color-word Stroop)       | Color-Word Stroop Heart Rate Variability: Log of High Frequency (ms <sup>2</sup> )                                     | QST    | Autonomic | Continuous | 0         | 0.2  | 15.2  | 5.2  |                 |
| average heart rate - ECG (pain-affect Stroop) | Average Pain-Affect Stroop Heart Rate - ECG (bpm)                                                                      | QST    | Autonomic | Continuous | 0         | 44.9 | 112.1 | 72.4 |                 |
| HRV: SDNN (pain-affect Stroop)                | Pain-Affect Stroop Heart Rate Variability - Standard Deviation of Normal-to-Normal Intervals (ms)                      | QST    | Autonomic | Continuous | 0         | 7.3  | 475.4 | 61.7 |                 |
| HRV: RMSSD (pain-affect Stroop)               | Pain-Affect Stroop Heart Rate Variability - Root Mean Square of the Difference Between Normal-to-Normal Intervals (ms) | QST    | Autonomic | Continuous | 0         | -4.7 | 673.3 | 52.3 |                 |
| HRV: total power (pain-affect Stroop)         | Pain-Affect Stroop Heart Rate Variability: Log of Total Power (ms <sup>2</sup> )                                       | QST    | Autonomic | Continuous | 0         | 3.1  | 13.1  | 6.7  |                 |
| HRV: low frequency (pain-affect Stroop)       | Pain-Affect Stroop Heart Rate Variability: Log of Low Frequency (ms <sup>2</sup> )                                     | QST    | Autonomic | Continuous | 0         | 2.5  | 9.7   | 5.6  |                 |
| HRV: very low frequency (pain-affect Stroop)  | Pain-Affect Stroop Heart Rate Variability: Log of Very Low Frequency (ms <sup>2</sup> )                                | QST    | Autonomic | Continuous | 0         | 2.2  | 12.2  | 5.6  |                 |
| HRV: high frequency (pain-affect Stroop)      | Pain-Affect Stroop Heart Rate Variability: Log of High Frequency (ms <sup>2</sup> )                                    | QST    | Autonomic | Continuous | 0         | 1.8  | 16.4  | 5.2  |                 |

| Abbreviated Name                                              | Full Name                                                                                                                                                               | Source | Domain   | Scale       | # missing | min | max | mean | Possible Levels |
|---------------------------------------------------------------|-------------------------------------------------------------------------------------------------------------------------------------------------------------------------|--------|----------|-------------|-----------|-----|-----|------|-----------------|
| count of 6 non-specific orofacial symptoms                    | CPSQ Q1: Count of Non-Specific Orofacial Symptoms                                                                                                                       | CPSQ   | Clinical | Continuous  | 9         | 0.0 | 6.0 | 0.4  |                 |
| TMJ noises in the past month                                  | CPSQ Q17/Q18: In the last month, did you have any jaw joint noises when you moved your jaw?                                                                             | CPSQ   | Clinical | Categorical | 40        |     |     |      | Yes, No         |
| pain with TMJ noises in the past month                        | CPSQ Q17D/18D: In the last month, when you had jaw joint noises, did pain occur with the joint noise?                                                                   | CPSQ   | Clinical | Categorical | 47        |     |     |      | Yes, No         |
| TMJ noises before last month                                  | CPSQ Q19: Prior to a month ago, did you have any jaw joint noises when you moved your jaw?                                                                              | CPSQ   | Clinical | Categorical | 39        |     |     |      | Yes, No         |
| could not open mouth wide in the last month                   | CPSQ Q21: In the last month, regardless of pain, was there a time when you could not open your mouth wide even for a moment?                                            | CPSQ   | Clinical | Categorical | 29        |     |     |      | Yes, No         |
| could not open mouth wide prior to 1 month ago                | CPSQ Q25: Prior to one month ago, regardless of pain, was there a time when you could not open your mouth wide even for a moment?                                       | CPSQ   | Clinical | Categorical | 32        |     |     |      | Yes, No         |
| could not close jaw from wide-open position in the last month | CPSQ Q27: In the last month, when you opened your mouth wide, did your jaw lock or catch even for a moment so that you could not close it from this wide open position? | CPSQ   | Clinical | Categorical | 32        |     |     |      | Yes, No         |

| Abbreviated Name                                                 | Full Name                                                                                                                                                                    | Source | Domain   | Scale       | # missing | min  | max  | mean | Possible Levels |
|------------------------------------------------------------------|------------------------------------------------------------------------------------------------------------------------------------------------------------------------------|--------|----------|-------------|-----------|------|------|------|-----------------|
| could not close jaw from wide-open position prior to 1 month ago | CPSQ Q30: Prior to one month ago, when you opened your mouth wide, did your jaw lock or catch even for a moment so that you could not close it from this wide open position? | CPSQ   | Clinical | Categorical | 22        |      |      |      | Yes, No         |
| jaw injury due to yawning                                        | CPSQ Q34: In your lifetime, have you been injured from yawning?                                                                                                              | CPSQ   | Clinical | Categorical | 10        |      |      |      | Yes, No         |
| jaw injury due to prolonged opening                              | CPSQ Q34: In your lifetime, have you been injured from prolonged mouth opening?                                                                                              | CPSQ   | Clinical | Categorical | 10        |      |      |      | Yes, No         |
| ever had orthodontic procedures                                  | CPSQ Q35: Have you had orthodontic procedures (i.e. braces)?                                                                                                                 | CPSQ   | Clinical | Categorical | 21        |      |      |      | Yes, No         |
| Oral parafunction sum score (OBC)                                | Sum of 21 Oral Behaviors Checklist responses                                                                                                                                 | OBC    | Clinical | Continuous  | 122       | 0.0  | 58.0 | 20.0 |                 |
| pain-free jaw opening                                            | Pain-free jaw opening (mm)                                                                                                                                                   | RDC    | Clinical | Continuous  | 23        | 25.0 | 77.0 | 47.8 |                 |
| Max. unassisted jaw opening                                      | Maximum unassisted jaw opening (mm)                                                                                                                                          | RDC    | Clinical | Continuous  | 23        | 30.0 | 77.0 | 53.3 |                 |
| # of locations with bruxo-facets                                 | Number of locations with bruxo-facets                                                                                                                                        | RDC    | Clinical | Continuous  | 40        | 0.0  | 3.0  | 2.3  |                 |
| # of TMJ palpation sounds: right                                 | Number of TMJ palpation sounds: right                                                                                                                                        | RDC    | Clinical | Continuous  | 29        | 0.0  | 4.0  | 0.5  |                 |
| # of TMJ palpation sounds: left                                  | Number of TMJ palpation sounds: left                                                                                                                                         | RDC    | Clinical | Continuous  | 29        | 0.0  | 4.0  | 0.6  |                 |
| # of anatomical locations with pain during unassisted opening    | Number of anatomical locations with pain during unassisted opening                                                                                                           | RDC    | Clinical | Continuous  | 72        | 0.0  | 6.0  | 0.7  |                 |
| # of anatomical locations with pain during assisted opening      | Number of anatomical locations with pain during assisted opening                                                                                                             | RDC    | Clinical | Continuous  | 72        | 0.0  | 6.0  | 0.8  |                 |
| # of painful anatomical locations during right lateral excursion | Number of anatomical locations with pain during right lateral excursion                                                                                                      | RDC    | Clinical | Continuous  | 72        | 0.0  | 6.0  | 0.1  |                 |

| Abbreviated Name                                                | Full Name                                                              | Source | Domain        | Scale       | # missing | min | max  | mean | Possible Levels |
|-----------------------------------------------------------------|------------------------------------------------------------------------|--------|---------------|-------------|-----------|-----|------|------|-----------------|
| # of painful anatomical locations during left lateral excursion | Number of anatomical locations with pain during left lateral excursion | RDC    | Clinical      | Continuous  | 72        | 0.0 | 6.0  | 0.1  |                 |
| # of painful anatomical locations during protrusion             | Number of anatomical locations with pain during protrusion             | RDC    | Clinical      | Continuous  | 72        | 0.0 | 4.0  | 0.1  |                 |
| # of palpation sites with pain (right temporalis)               | Number of palpation sites with pain: right temporalis                  | RDC    | Clinical      | Continuous  | 0         | 0.0 | 10.0 | 0.7  |                 |
| # of palpation sites with pain (left temporalis)                | Number of palpation sites with pain: left temporalis                   | RDC    | Clinical      | Continuous  | 0         | 0.0 | 10.0 | 0.5  |                 |
| # of palpation sites with pain (right masseter)                 | Number of palpation sites with pain: right masseter                    | RDC    | Clinical      | Continuous  | 0         | 0.0 | 10.0 | 0.9  |                 |
| # of palpation sites with pain (left masseter)                  | Number of palpation sites with pain: left masseter                     | RDC    | Clinical      | Continuous  | 0         | 0.0 | 10.0 | 0.9  |                 |
| # of palpation sites with pain (right mandibular)               | Number of palpation sites with pain: right mandibular                  | RDC    | Clinical      | Continuous  | 0         | 0.0 | 2.0  | 0.2  |                 |
| # of palpation sites with pain (left mandibular)                | Number of palpation sites with pain: left mandibular                   | RDC    | Clinical      | Continuous  | 0         | 0.0 | 2.0  | 0.2  |                 |
| # of palpation sites with pain: (right lat. Pterygoid)          | Number of palpation sites with pain: right lat. pterygoid              | RDC    | Clinical      | Continuous  | 2         | 0.0 | 1.0  | 0.2  |                 |
| # of palpation sites with pain: (left lat. Pterygoid)           | Number of palpation sites with pain: left lat. pterygoid               | RDC    | Clinical      | Continuous  | 2         | 0.0 | 1.0  | 0.2  |                 |
| # of palpation sites with pain (right TM joint)                 | Number of palpation sites with pain: right TM joint                    | RDC    | Clinical      | Continuous  | 0         | 0.0 | 3.0  | 0.1  |                 |
| # of palpation sites with pain (left TM joint)                  | Number of palpation sites with pain: left TM joint                     | RDC    | Clinical      | Continuous  | 0         | 0.0 | 3.0  | 0.2  |                 |
| # of neck sites tender to palpation                             | Number of neck sites tender to palpation                               | RDC    | Clinical      | Continuous  | 1         | 0.0 | 13.0 | 1.2  |                 |
| # of body sites tender to palpation                             | Number of body sites tender to palpation                               | RDC    | Clinical      | Continuous  | 0         | 0.0 | 14.0 | 2.3  |                 |
| functional limitation in jaw opening (JFLS)                     | JFLS Opening Limitation Score                                          | JFLS   | Clinical      | Continuous  | 149       | 0.0 | 9.8  | 0.2  |                 |
| any headaches in the past year                                  | CPSQ Q36: In the past year, have you had any headaches?                | CPSQ   | Health Status | Categorical | 12        |     |      |      | Yes, No         |

| Abbreviated Name                                   | Full Name                                                                         | Source          | Domain        | Scale       | # missing | min | max  | mean | Possible Levels |
|----------------------------------------------------|-----------------------------------------------------------------------------------|-----------------|---------------|-------------|-----------|-----|------|------|-----------------|
| # of different types of headaches in the last year | CPSQ Q38: In the past year, how many different types of headaches have you had?   | CPSQ            | Health Status | Continuous  | 28        | 0.0 | 4.0  | 1.4  |                 |
| chronic pain other than face                       | CPSQ Q42: Do you have a persistent or chronic pain in areas other than the face?  | CPSQ            | Health Status | Categorical | 56        |     |      |      | Yes, No         |
| count of 20 comorbid conditions                    | CPSQ Q50: count of 20 comorbidities                                               | CPSQ            | Health Status | Continuous  | 35        | 0.0 | 19.0 | 0.7  |                 |
| current low back pain                              | CPSQ Q51A: Do you currently have low back pain?                                   | CPSQ            | Health Status | Categorical | 17        |     |      |      | Yes, No         |
| episodes of low back pain in the last year         | CPSQ Q51C: How many episodes of low back pain have you had in the past 12 months? | CPSQ            | Health Status | Continuous  | 32        | 0.0 | 4.0  | 1.2  |                 |
| ROME IBS classification                            | CPSQ Q53: ROME Irritable Bowel Syndrome classification                            | CPSQ            | Health Status | Categorical | 31        |     |      |      | Yes, No         |
| count of 10 IBS symptoms                           | CPSQ Q53: count of 10 Irritable Bowel Syndrome symptoms                           | CPSQ            | Health Status | Continuous  | 28        | 0.0 | 10.0 | 1.4  |                 |
| vulvodynia classification                          | CPSQ Q54-Q57: vulvodynia case classification                                      | CPSQ            | Health Status | Categorical | 83        |     |      |      | Yes, No         |
| history of 7 cardiovascular conditions             | MedHx Q1: History of 7 cardiovascular conditions                                  | Medical History | Health Status | Continuous  | 15        | 0.0 | 2.0  | 0.1  |                 |
| history of 3 hematologic conditions                | MedHx Q2: History of 3 hematologic conditions                                     | Medical History | Health Status | Continuous  | 10        | 0.0 | 2.0  | 0.1  |                 |
| history of 4 neural/sensory conditions             | MedHx Q3: History of 4 neural/sensory conditions                                  | Medical History | Health Status | Continuous  | 9         | 0.0 | 3.0  | 0.3  |                 |
| history of 3 endocrine conditions                  | MedHx Q5: History of 3 endocrine conditions                                       | Medical History | Health Status | Continuous  | 9         | 0.0 | 3.0  | 0.0  |                 |
| history of 5 respiratory conditions                | MedHx Q6: History of 5 respiratory conditions                                     | Medical History | Health Status | Continuous  | 11        | 0.0 | 4.0  | 0.6  |                 |
| history of osteoarthritis                          | MedHx Q7: History of osteoarthritis                                               | Medical History | Health Status | Continuous  | 8         |     |      |      | Yes, No         |

| Abbreviated Name                              | Full Name                                                                            | Source          | Domain        | Scale       | # missing | min  | max  | mean | Possible Levels             |
|-----------------------------------------------|--------------------------------------------------------------------------------------|-----------------|---------------|-------------|-----------|------|------|------|-----------------------------|
| history of rheumatoid arthritis               | MedHx Q7: History of rheumatoid arthritis                                            | Medical History | Health Status | Continuous  | 8         |      |      |      | Yes, No                     |
| history of Sjogrens syndrome                  | MedHx Q7: History of Sjogrens syndrome                                               | Medical History | Health Status | Continuous  | 8         |      |      |      | Yes, No                     |
| history of obstructive sleep apnea            | MedHx Q10: History of obstructive sleep apnea                                        | Medical History | Health Status | Continuous  | 89        |      |      |      | Yes, No                     |
| past use of 11 medications                    | MedHx Q12: Number of medications taken in the past                                   | Medical History | Health Status | Continuous  | 11        | 0.0  | 7.0  | 1.5  |                             |
| smoking history (current/former/never)        | MedHx Q14/Q16: Smoking history: current, former or never                             | Medical History | Health Status | Categorical | 54        |      |      |      | Current, Former, Never      |
| self-rated general health                     | MedHx Q18: How do you describe your health overall?                                  | Medical History | Health Status | Categorical | 15        |      |      |      | Excellent, Good, Fair, Poor |
| ever hospitalized for surgery/serious illness | MedHx Q19: Have you been hospitalized for any surgical operation or serious illness? | Medical History | Health Status | Categorical | 13        |      |      |      | Yes, No                     |
| global sleep score (PSQI)                     | PSQI Global Score                                                                    | PSQI            | Health Status | Continuous  | 0         | 0.0  | 19.0 | 4.7  |                             |
| sleep duration (PSQI)                         | PSQI Actual Sleep Duration in Hours                                                  | PSQI            | HealthStatus  | Continuous  | 30        | 0.0  | 99.0 | 7.3  |                             |
| sleep quality (PSQI)                          | PSQI Sleep Quality Scale                                                             | PSQI            | Health Status | Continuous  | 9         | 0.0  | 3.0  | 0.9  |                             |
| medicine to sleep (PSQI)                      | PSQI Medicine to Sleep Scale                                                         | PSQI            | Health Status | Continuous  | 24        | 0.0  | 3.0  | 0.2  |                             |
| sleep duration score (PSQI)                   | PSQI Sleep Duration Scale                                                            | PSQI            | Health Status | Continuous  | 30        | 0.0  | 3.0  | 0.5  |                             |
| sleep efficiency (PSQI)                       | PSQI Sleep Efficiency Scale                                                          | PSQI            | Health Status | Continuous  | 81        | 0.0  | 3.0  | 0.3  |                             |
| sleep latency (PSQI)                          | PSQI Sleep Latency Scale                                                             | PSQI            | Health Status | Continuous  | 37        | 0.0  | 3.0  | 1.0  |                             |
| daytime dysfunction (PSQI)                    | PSQI Daytime Dysfunction Scale                                                       | PSQI            | Health Status | Continuous  | 42        | 0.0  | 3.0  | 0.7  |                             |
| physical component summary score (SF-12v2)    | SF-12v2 Physical Component Summary Score                                             | SF-12           | Health Status | Continuous  | 140       | 28.8 | 68.3 | 52.7 |                             |

| Abbreviated Name                         | Full Name                              | Source | Domain        | Scale      | # missing | min  | max   | mean | Possible Levels |
|------------------------------------------|----------------------------------------|--------|---------------|------------|-----------|------|-------|------|-----------------|
| mental component summary score (SF-12v2) | SF-12v2 Mental Component Summary Score | SF-12  | Health Status | Continuous | 140       | 4.5  | 68.9  | 51.6 |                 |
| physical functioning (SF-12v2)           | SF-12v2 Physical Functioning Z-score   | SF-12  | Health Status | Continuous | 47        | -2.8 | 0.6   | 0.4  |                 |
| role-physical (SF-12v2)                  | SF-12v2 Role-Physical Z-score          | SF-12  | Health Status | Continuous | 33        | -3.0 | 0.7   | 0.3  |                 |
| bodily pain (SF-12v2)                    | SF-12v2 Bodily Pain Z-score            | SF-12  | Health Status | Continuous | 59        | -3.3 | 0.7   | 0.4  |                 |
| general health (SF-12v2)                 | SF-12v2 General Health Z-score         | SF-12  | Health Status | Continuous | 22        | -3.1 | 1.2   | 0.4  |                 |
| vitality (SF-12v2)                       | SF-12v2 Vitality Z-score               | SF-12  | Health Status | Continuous | 14        | -2.2 | 1.8   | 0.3  |                 |
| social functioning (SF-12v2)             | SF-12v2 Social Functioning Z-score     | SF-12  | Health Status | Continuous | 21        | -3.4 | 0.7   | 0.1  |                 |
| role-emotional (SF-12v2)                 | SF-12v2 Role-Emotional Z-score         | SF-12  | Health Status | Continuous | 24        | -3.9 | 0.6   | -0.1 |                 |
| mental health (SF-12v2)                  | SF-12v2 Mental Health Z-score          | SF-12  | Health Status | Continuous | 18        | -3.4 | 1.5   | 0.1  |                 |
| BMI                                      | Body mass index (kg/m <sup>2</sup> )   | APM    | Health Status | Continuous | 32        | 13.9 | 70.8  | 26.1 |                 |
| finger length ratio (index:ring)         | Finger length ratio (index:ring)       | APM    | Health Status | Continuous | 14        | 84.7 | 123.4 | 96.3 |                 |
