# Supplementary material
Source: PubMed Central journal article supplement (PMC4036699)

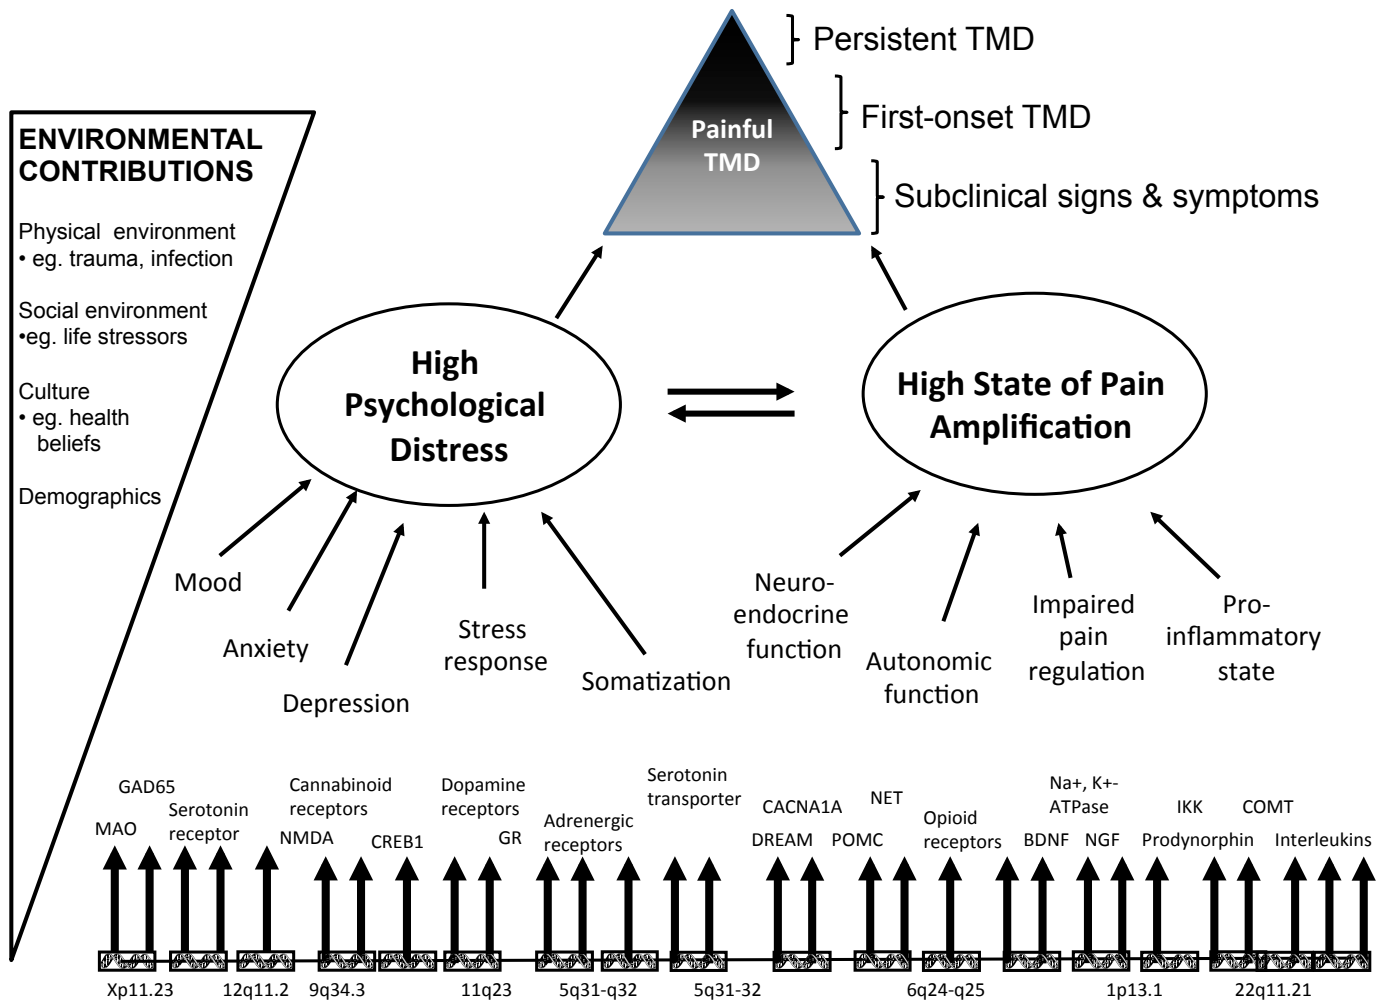

Supplement: NIHMS527472-supplement-Supplementary_Figure_1.pdf [file NIHMS527472-supplement-Supplementary_Figure_1.pdf]

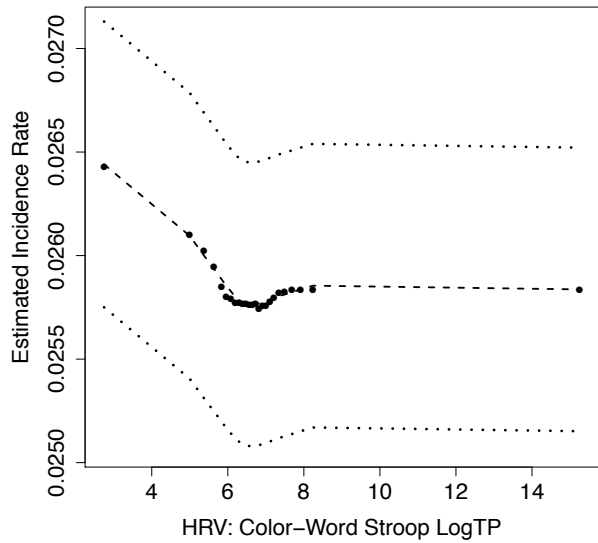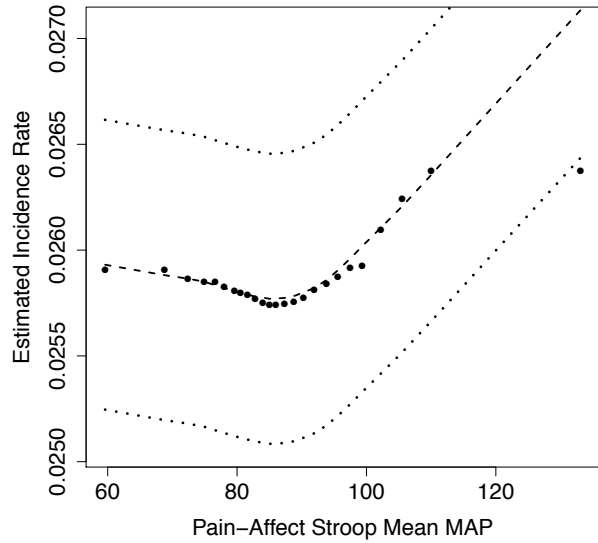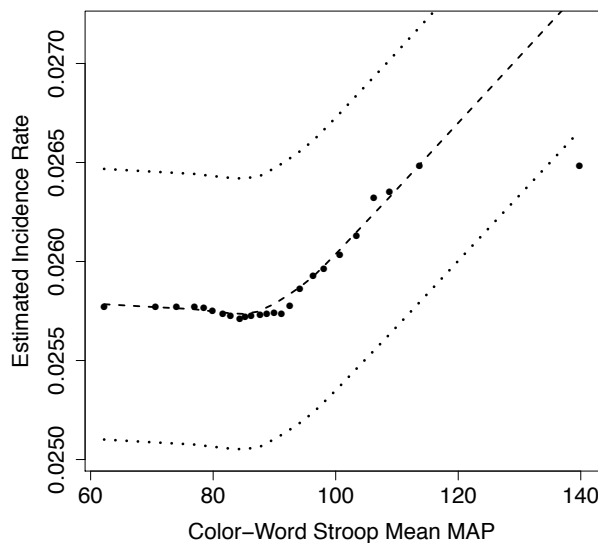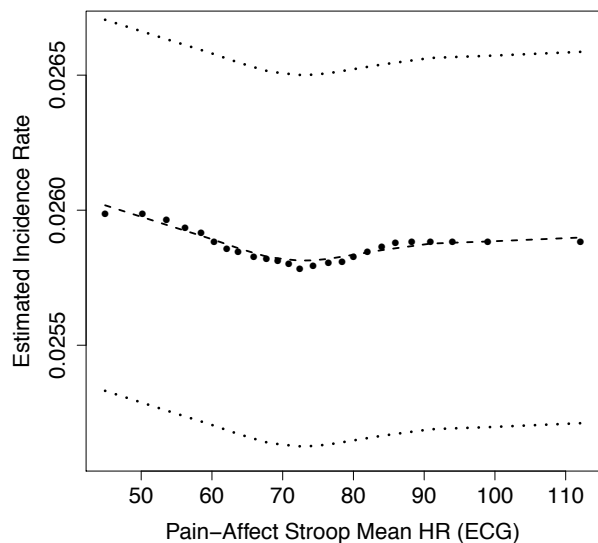

Supplement: NIHMS527472-supplement-Supplementary_Figure_10.pdf [file NIHMS527472-supplement-Supplementary_Figure_10.pdf]

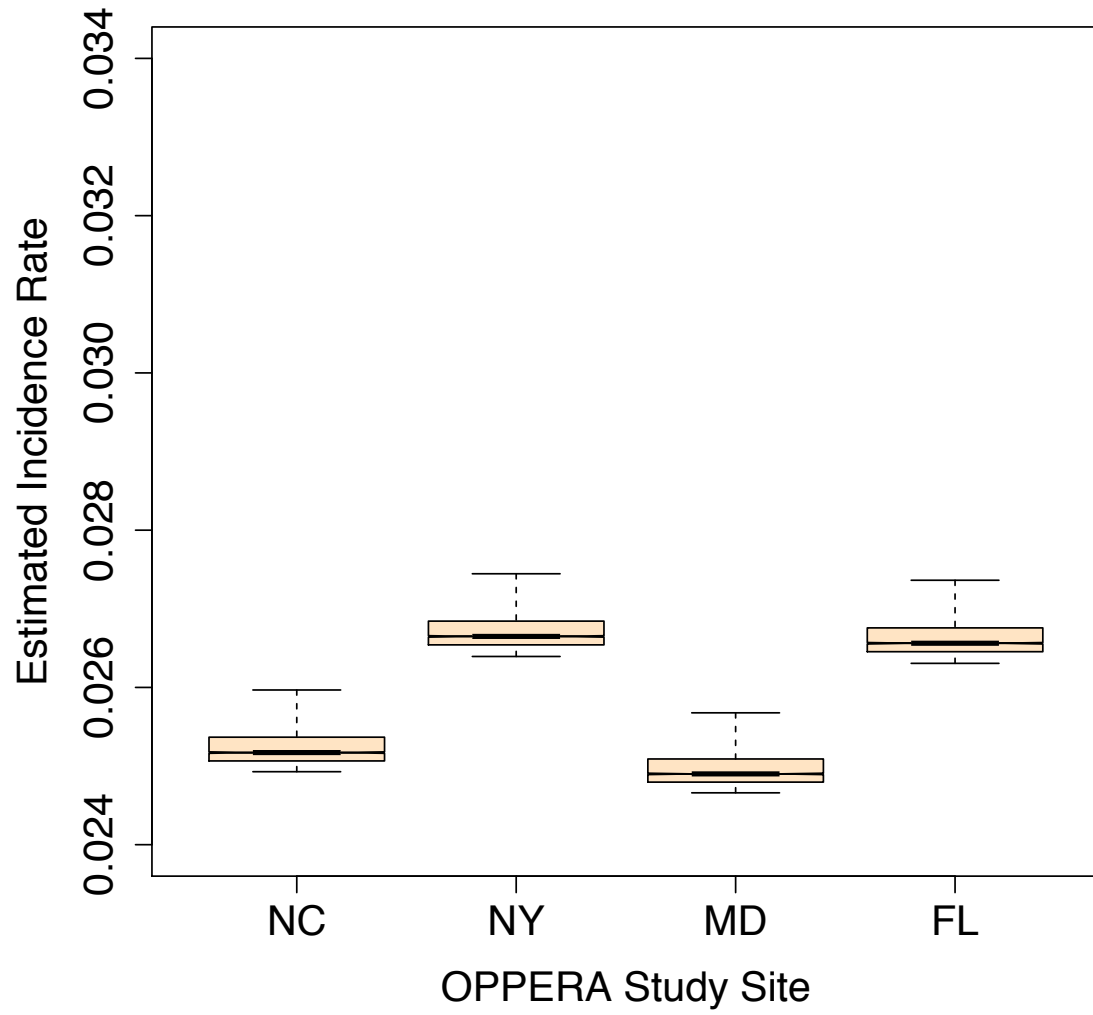

Supplement: NIHMS527472-supplement-Supplementary_Figure_2.pdf [file NIHMS527472-supplement-Supplementary_Figure_2.pdf]

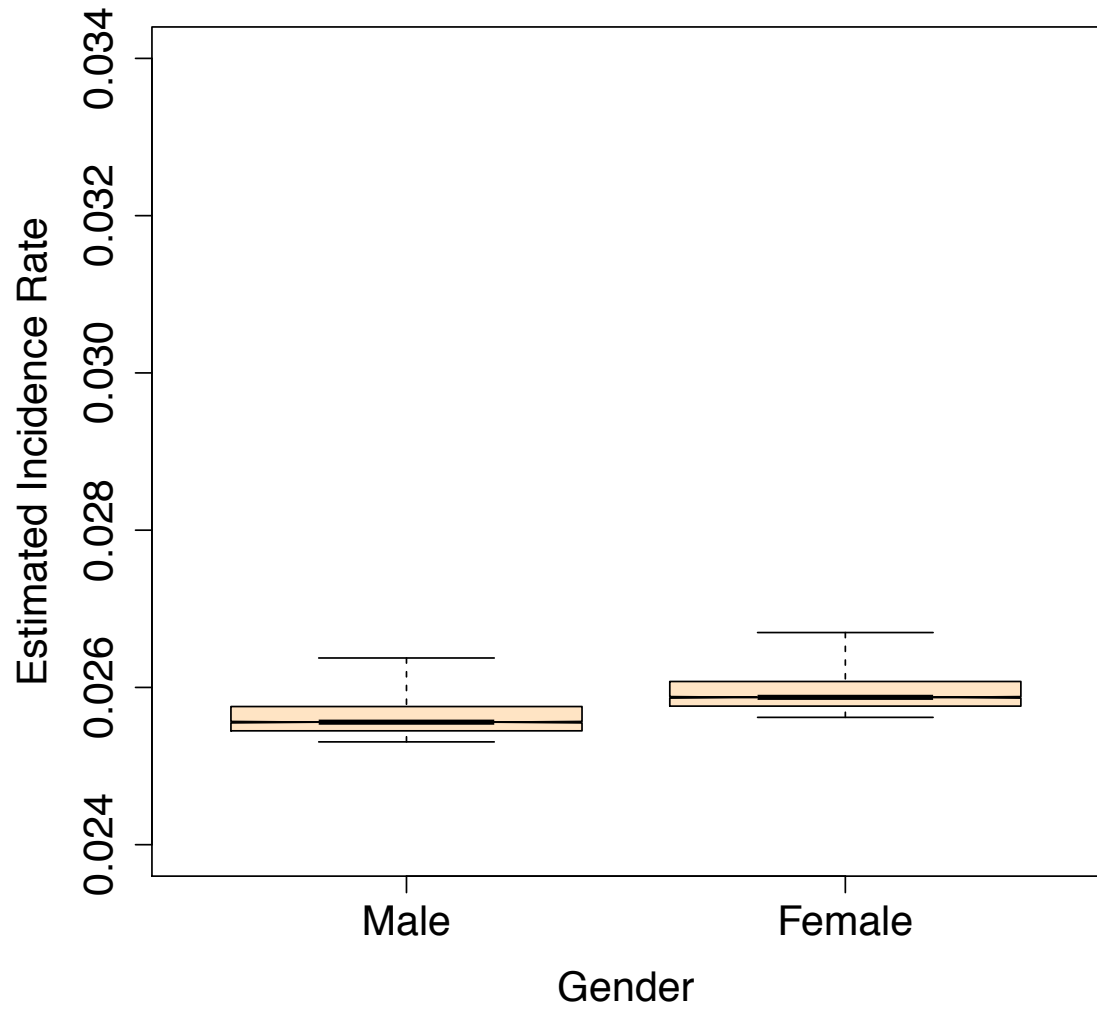

Supplement: NIHMS527472-supplement-Supplementary_Figure_3.pdf [file NIHMS527472-supplement-Supplementary_Figure_3.pdf]

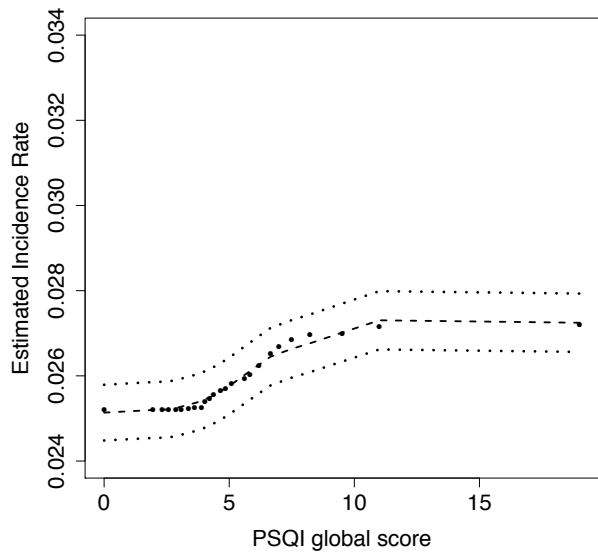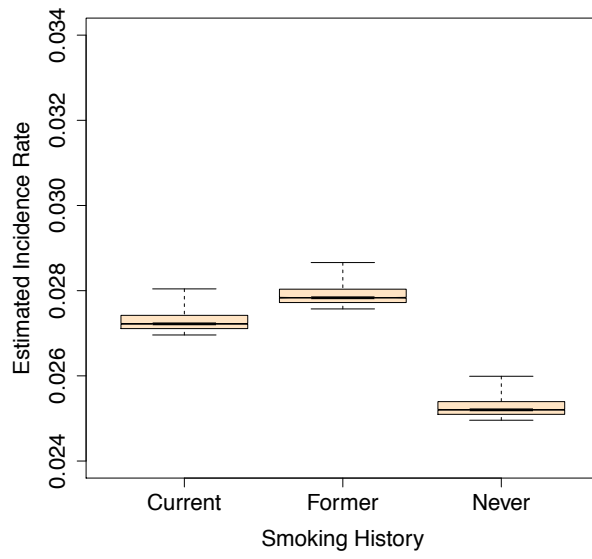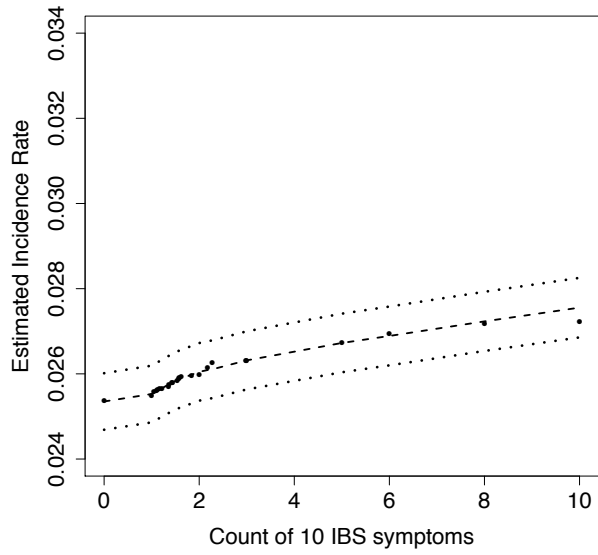

Supplement: NIHMS527472-supplement-Supplementary_Figure_4.pdf [file NIHMS527472-supplement-Supplementary_Figure_4.pdf]

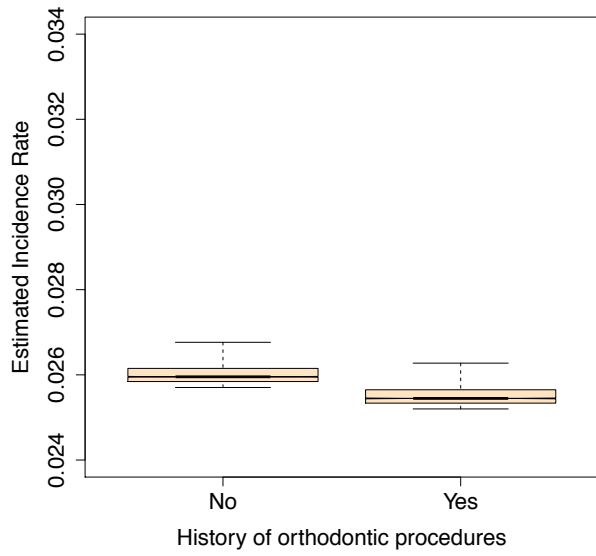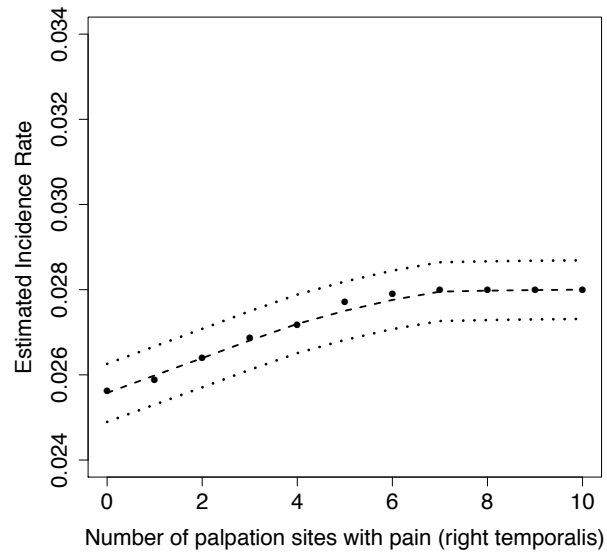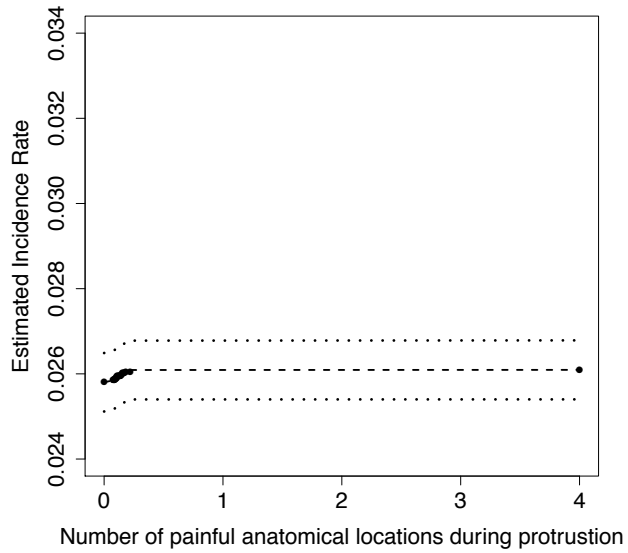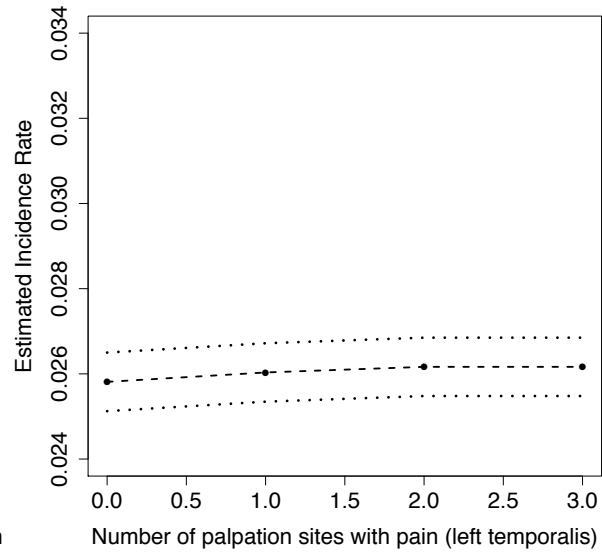

Supplement: NIHMS527472-supplement-Supplementary_Figure_5.pdf [file NIHMS527472-supplement-Supplementary_Figure_5.pdf]

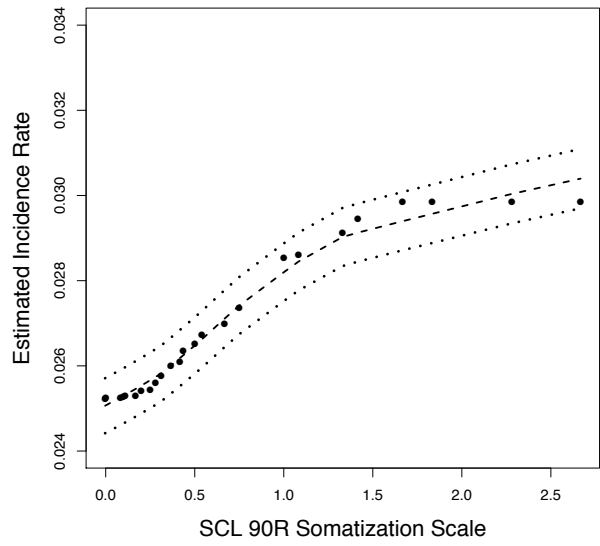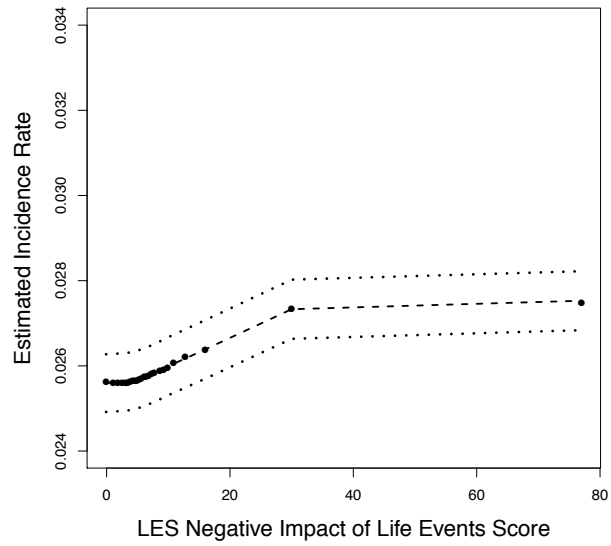

Supplement: NIHMS527472-supplement-Supplementary_Figure_6.pdf [file NIHMS527472-supplement-Supplementary_Figure_6.pdf]

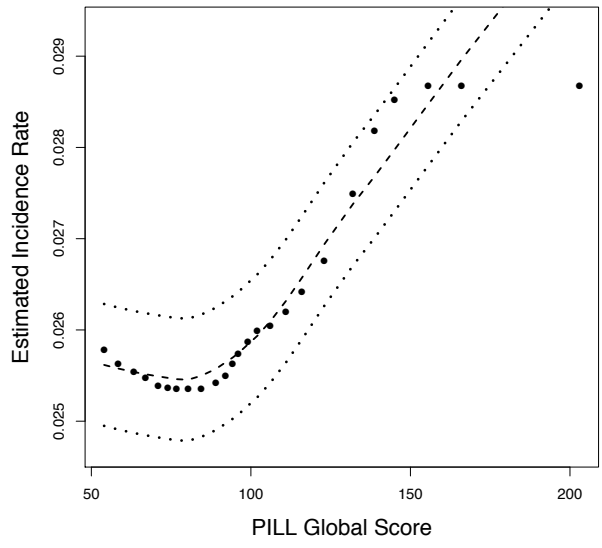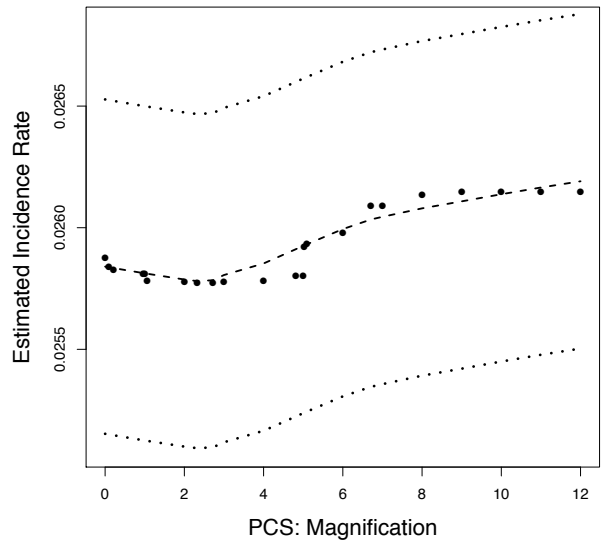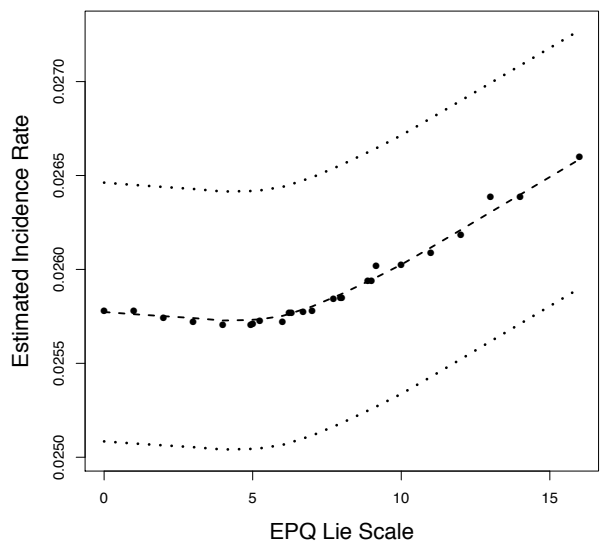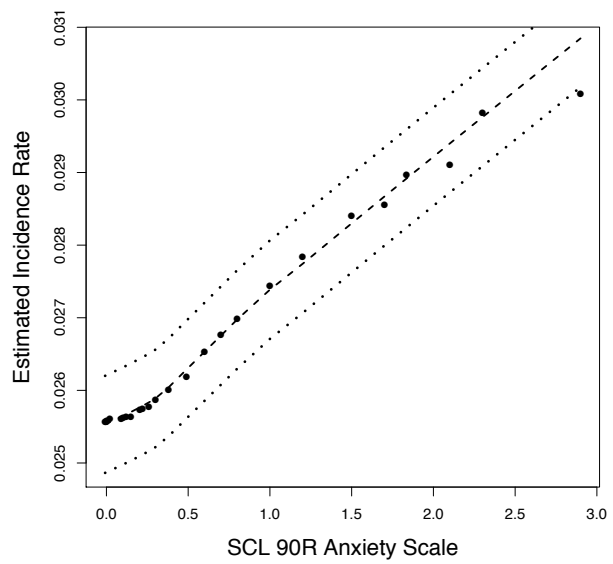

Supplement: NIHMS527472-supplement-Supplementary_Figure_7.pdf [file NIHMS527472-supplement-Supplementary_Figure_7.pdf]

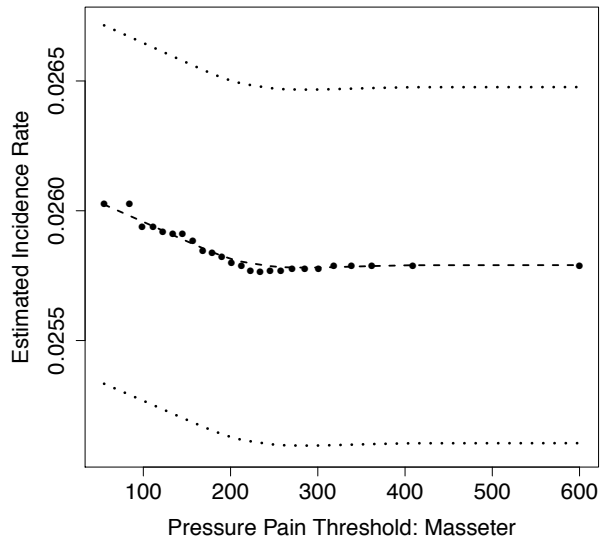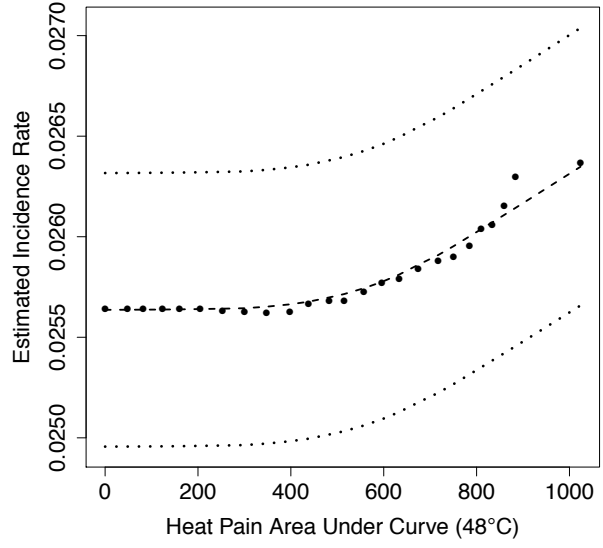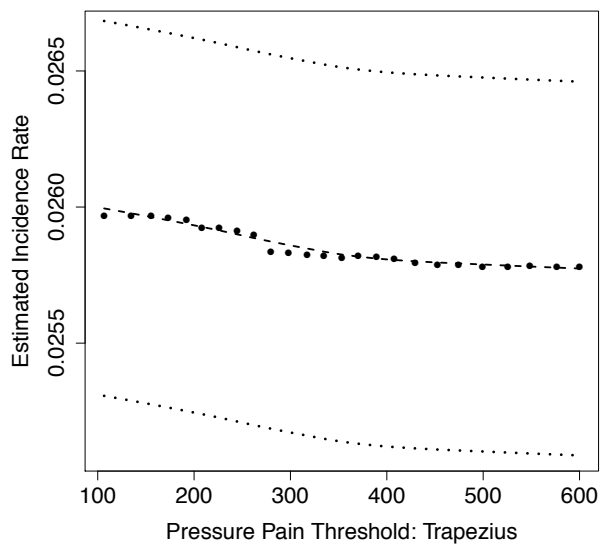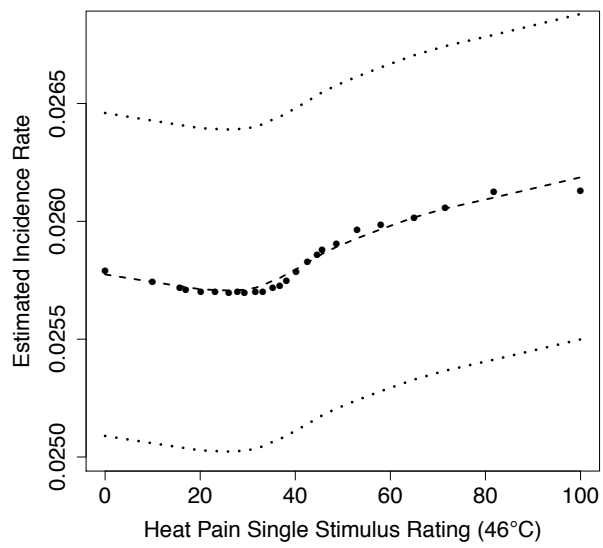

Supplement: NIHMS527472-supplement-Supplementary_Figure_8.pdf [file NIHMS527472-supplement-Supplementary_Figure_8.pdf]

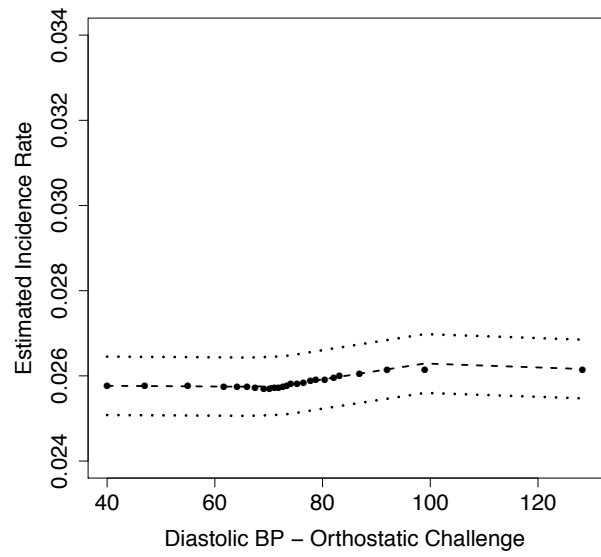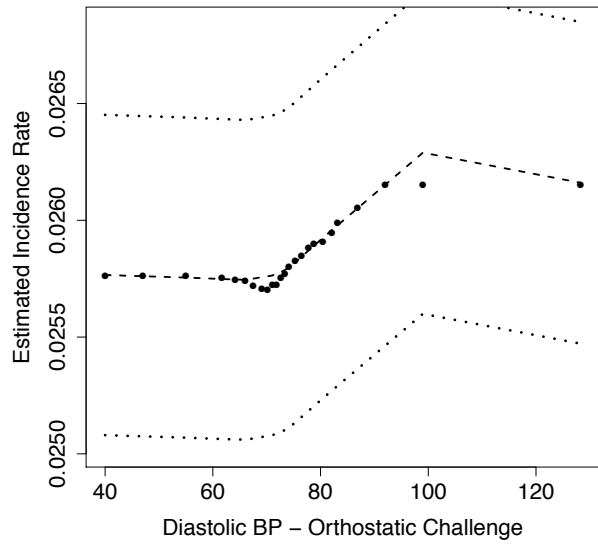

Supplement: NIHMS527472-supplement-Supplementary_Figure_9.pdf [file NIHMS527472-supplement-Supplementary_Figure_9.pdf]
